# Supplementary material for: Protist.guru: a comparative transcriptomics database for the protist kingdom
Source: bioRxiv or medRxiv preprint supplement (doi:10.1101/2021.08.04.455173), 2021-08-06

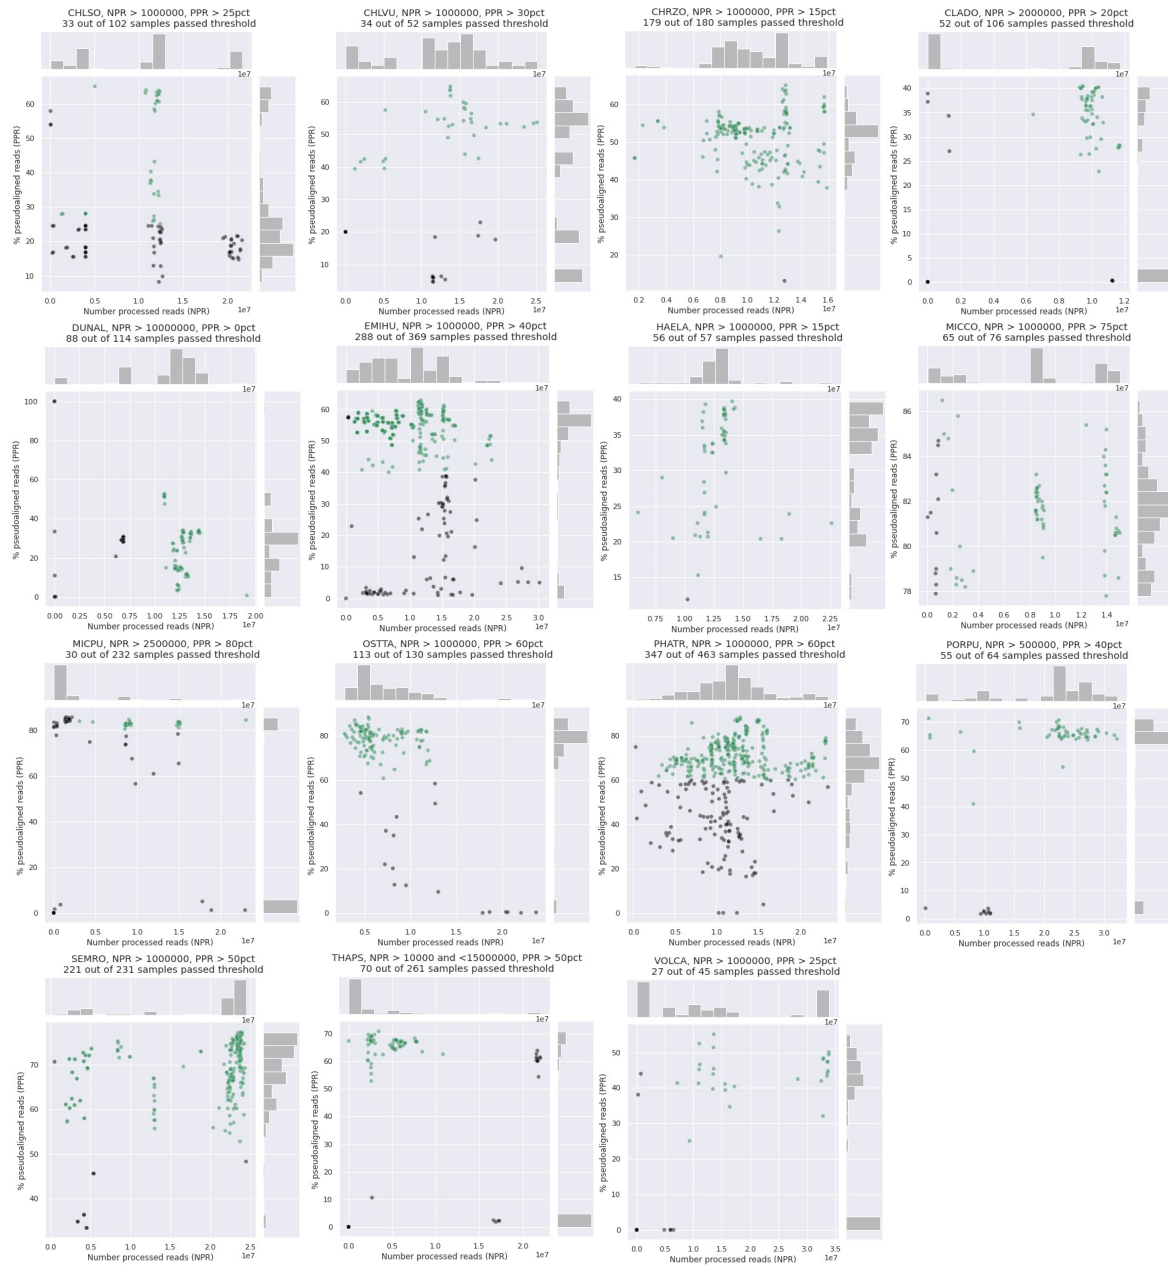

Supplement: Supplementary file [file media-1.pdf]
